# **Auxin-induced expression divergence between Arabidopsis species likely originates within the TIR1/AFB-AUX/IAA-ARF module**

running title: comparative transcriptomics of auxin responses

Jana Trenner<sup>1,2,\*</sup>, Yvonne Poeschl<sup>3,4,\*</sup>, Jan Grau<sup>4</sup>, Andreas Gogol-Döring<sup>3,4</sup>, Marcel Quint<sup>1,2</sup> and Carolin Delker<sup>1,2</sup>

<sup>1</sup> Institute of Agricultural and Nutritional Sciences, Martin Luther University Halle-Wittenberg, Betty-Heimann-Str. 5, 06120 Halle (Saale), Germany

<sup>2</sup> Department of Molecular Signal Processing, Leibniz Institute of Plant Biochemistry, Weinberg 3, 06120 Halle (Saale), Germany

<sup>3</sup> German Centre for Integrative Biodiversity Research (iDiv) Halle-Jena-Leipzig, Deutscher Platz 5e, 04103 Leipzig, Germany

<sup>4</sup> Institute of Computer Science, Martin Luther University Halle-Wittenberg, Von-Seckendorff-Platz 1, 06120 Halle (Saale), Germany

\* these authors contributed equally to this work

author for correspondence: Carolin Delker

carolin.delker@landw.uni-halle.de

phone: +49-345-5522629

Jana Trenner

Jana.Trenner@ipb-halle.de

Yvonne Poeschl

yvonne.poeschl@informatik.uni-halle.de

Jan Grau

grau@informatik.uni-halle.de

Andreas Gogol-Döring

[gogol-doering@idiv.de](mailto:gogol-doering@idiv.de)

Marcel Quint

marcel.quint@landw.uni-halle.de

date of submission: September 6, 2016 # of tables: 1 # of figures: 6, all color

word count (Introduction – Acknowledgements): 6500

Supplementary data: 3 Tables, 4 Figures, additional methods, 2 data files

## 32 **Highlight**

TIR1/AFB, AUX/IAA, and ARF proteins show interspecies expression variation  
34 correlating with variation in downstream responses which indicates a source for  
natural variation within this conserved signaling module.

## 36 **Abstract**

Auxin is an essential regulator of plant growth and development and auxin  
38 signaling components are conserved among land plants. Yet, a remarkable degree  
of natural variation in physiological and transcriptional auxin responses has been  
40 described among *Arabidopsis thaliana* accessions. As intra-species comparisons  
offer only limited genetic variation, we here inspect the variation of auxin  
42 responses between *A. thaliana* and *A. lyrata*. This approach allowed the  
identification of conserved auxin response genes including novel genes with  
44 potential relevance for auxin biology. Furthermore, promoter divergences were  
analyzed for putative sources of variation. *De novo* motif discovery identified novel  
46 and variants of known elements with potential relevance for auxin responses,  
emphasizing the complex, and yet elusive, code of element combinations  
48 accounting for the diversity in transcriptional auxin responses. Furthermore,  
network analysis revealed correlations of inter-species differences in the  
50 expression of *AUX/IAA* gene clusters and classic auxin-related genes. We  
conclude that variation in general transcriptional and physiological auxin  
52 responses may originate substantially from functional or transcriptional variations  
in the TIR1/AFB, AUX/IAA, and ARF signaling network. In that respect, *AUX/IAA*  
54 gene expression divergence potentially reflects differences in the manner in which  
different species transduce identical auxin signals into gene expression  
56 responses.

## 58 **Key words**

*Arabidopsis*, auxin, comparative transcriptomics, natural variation, profile  
60 interaction finder, promoter motif, auxin code

## 62 Introduction

Auxin's capacity to regulate the essential cellular processes of division, elongation  
 64 and differentiation integrates it in the regulation of virtually all developmental and  
 physiological plant processes. On a molecular level, auxin responses involve  
 66 extensive and rapid changes in the transcriptome (Paponov *et al.*, 2008). This  
 response depends on a signaling pathway which is constituted by three main  
 68 signaling components: (i) TRANSPORT INHIBITOR RESPONSE1/AUXIN  
 SIGNALING F-BOX 1-5 (TIR1/AFBs) auxin-co-receptors, (ii) AUXIN/INDOLE-3-  
 70 ACETIC ACID (AUX/IAA) family of auxin co-receptors/transcriptional repressors,  
 and (iii) the AUXIN RESPONSE FACTOR (ARF) family of transcription factors  
 72 (Quint and Gray, 2006).

ARFs induce or repress the expression of genes by binding to auxin-responsive  
 74 elements (AuxRE) in the respective promoter regions (Guilfoyle *et al.*, 1998;  
 Ulmasov *et al.*, 1999). When auxin levels are low, AUX/IAAs prevent ARF  
 76 regulatory action on auxin-responsive genes (Weijers *et al.*, 2005; Szemenyei *et al.*,  
 2008). The presence of auxin is sensed by a co-receptor complex formed by  
 78 the cooperative binding of auxin by the TIR1/AFB F-box subunit of an SCF-type E3  
 ligase and an AUX/IAA protein (Dharmasiri *et al.*, 2005; Kepinski and Leyser,  
 80 2005; Calderón Villalobos *et al.*, 2012). This binding results in the  
 polyubiquitylation of the AUX/IAAs by the SCF<sup>TIR1/AFB</sup> complex (Maraschin *et al.*,  
 82 2009). The subsequent proteasomal degradation of the tagged AUX/IAAs causes  
 a de-repression of ARF transcription factors, which are then released to initiate  
 84 transcriptional changes (Ramos *et al.*, 2001; Zenser *et al.*, 2001). The three key  
 signaling elements of TIR1/AFBs, AUX/IAAs, and ARFs are encoded by gene  
 86 families of six, 29 and 23 members, respectively (Chapman and Estelle, 2009).  
 Numerous possibilities of combinations among the individual gene family members  
 88 with putatively different signaling capacities could ultimately be responsible for the  
 wide range of auxin signaling outputs observed throughout plant growth and  
 90 development (Calderon Villalobos *et al.*, 2012; Salehin *et al.*, 2015).

The auxin signaling pathway is conserved among land plants as individual core  
 92 components are present already in the liverwort *Marchantia polymorpha* (Kato *et al.*,  
 2015). With the universal impact of auxin on plant growth and development, an

94 open question in auxin biology remains whether auxin signaling and response  
contribute to adaptive processes to local environmental conditions and challenges.  
96 First data indicating that the read-out of an auxin stimulus can be highly variable  
were obtained by the analysis of natural variation of auxin responses among  
98 different natural accessions of *A. thaliana* (Delker *et al.*, 2010). Variation in  
transcriptomes and co-expression networks of signaling elements gave rise to the  
100 hypothesis that altered equilibria of individual signaling components might  
contribute to the variation observed on the general transcriptome and ultimately on  
102 the physiological level (Delker *et al.*, 2010).

Here, we performed a cross-species analysis of auxin responses in the two closely  
104 related species *A. thaliana* and *A. lyrata* in a comparative transcriptomics  
approach. The increased genetic variation between the two *Arabidopsis* species  
106 compared to the variation among different accessions allowed (i) the identification  
of conserved auxin response genes, (ii) the identification of *cis*-regulatory  
108 elements that might contribute to auxin responses, (iii) to assess whether the  
hypothesized variation in early auxin signaling gene expression as a source for  
110 downstream variation could be verified in a system with higher genetic variation,  
and (iv) the comparison of inter- and intra-species variation of *AUX/IAA* gene  
112 clusters and downstream variation.

## Materials and Methods

### 114 *Plant material and growth conditions*

*A. thaliana* Col-0 (N1092) and *A. lyrata* (N22696) were obtained from the  
116 Nottingham Arabidopsis Stock Centre. Seeds were surface-sterilized and stratified  
3 d at 4 °C before sowing. Seedlings were grown on solid or in liquid *Arabidopsis*  
118 *thaliana* solution (ATS) nutrient medium (Lincoln *et al.*, 1990). For growth assays,  
seedlings were cultivated on vertical ATS for 3 d (IAA), 4 d (TIHE), or 5 d (2,4-D  
120 and NAA) before transfer to plates supplemented with IAA, 2,4-D, or NAA at the  
indicated concentrations or before transfer of plates to 28 °C (TIHE). Root lengths  
122 were quantified after an additional 5 d (IAA) or 3 d (2,4-D and NAA), hypocotyl  
growth was quantified after additional 4 d at 28 °C. All experiments were  
124 performed in long-day conditions (16 h light/8 h dark) and a fluence rate of ~ 230  
 $\mu\text{mol m}^{-2} \text{sec}^{-1}$  (root growth assays) or 30  $\mu\text{mol m}^{-2} \text{sec}^{-1}$  (TIHE). Relative root and

hypocotyl lengths of hormone- and temperature-treated seedlings, respectively, were determined as percent in relation to the median value of 20 °C grown plants. Statistical analyses (1- and 2-way ANOVAs) were performed on the untransformed raw data. For expression studies and [<sup>3</sup>H]-IAA uptake assays, seeds were cultivated in liquid ATS under continuous illumination to minimize potential circadian effects. For expression analyses, ATS was supplemented with 1 μM IAA for 0, 1 h, and 3 h after seven days. Yellow long-pass filters were applied in all IAA treatment experiments to prevent photodegradation of IAA.

#### [<sup>3</sup>H]-IAA uptake assay

Three biological replicates of seven days-old seedlings were treated with 2 nM of [<sup>3</sup>H]-IAA (Hartmann Analytic, Germany) per mg seedling fresh weight in liquid ATS for 1 h. Samples were subsequently washed with liquid ATS ten times before quantification via scintillation count.

#### RNA extraction and microarray hybridization

RNA was extracted from three biological samples of seven days-old whole seedlings using the RNeasy Plant Mini Kit (Qiagen). RNA samples were further processed and hybridized to the ATH1-121501 microarray by the Nottingham Arabidopsis Stock Centre's microarray hybridization service.

#### Probe masking, data normalization and data processing

The raw data generated by NASC was pre-processed and corrected according to (Poeschl *et al.*, 2013) including the proposed polynomial correction of probe intensities. The data matrix contained the expression values for 16315 genes at three time points (with three biological replicates each) for both species.

Significant changes in auxin-induced expression were determined by a modified t-test (Opge-Rhein and Strimmer, 2007). P-values were Benjamini-Hochberg-corrected for multiple testing and genes significantly (fdr < 5%) changed by a factor of two or more ( $|\log_2 \text{fold change}| > 1$ ) were considered to be differentially expressed.

#### Modified Pearson correlation

To incorporate the information on variation among the biological replicate

156 measurements at each time point in the correlation analyses, a modified Pearson correlation coefficient (*mod.r*) was introduced.  $mod.r(x_A, x_B)$  of the expression  
158 profiles for two genes A and B was computed by dividing the covariance of the mean expression profiles  $cov(\bar{x}_A, \bar{x}_B)$  by the product of the standard deviations  
160 of the expression profiles  $sd(x_A) \cdot sd(x_B)$ , which is given by the formula:

$$mod.r(x_A, x_B) = \frac{cov(\bar{x}_A, \bar{x}_B)}{sd(x_A) \cdot sd(x_B)}$$

162 The mean expression profiles ( $\bar{x}_A$  and  $\bar{x}_B$ ) consist of one value per time point, which represent the means of the respective replicates.

#### 164 *Cluster Analysis*

A total of N=9091 genes were selected based on a coefficient of variation (cv) in  
166 expression profiles of  $cv > 0.05$ . A hierarchical clustering with average linkage was performed on N expression profiles using  $1 - mod.r$  as distance measure. Each  
168 expression profile consists of 18 measurements representing the three biological replicates of three time points and two species. The resulting dendrogram was  
170 cut level 0.1 ( $mod.r = 0.9$ ) and resulting clusters were subsequently filtered by the following parameters: Clusters needed to contain at least five genes of which 70%  
172 showed a significant difference in species, time point and interaction as assessed by two-way ANOVAs which resulted in 14 clusters containing 337 genes in total.

#### 174 *Promoter Analysis*

Promoter sequences for *A. thaliana* and *A. lyrata* were extracted using the  
176 annotation provided by Phytozome v7.0 (<http://www.phytozome.com>). A promoter sequence was defined as 500 bp upstream the transcription start site to 100 bp  
178 downstream the transcription start site, or to the start codon, whichever came first.

#### *Extraction and assignment of known cis-elements*

180 Extracted promoter sequences were analyzed for the presence of a set of annotated *cis*-elements and their reverse complements from  
182 <http://arabidopsis.med.ohio-state.edu/AtcisDB/bindingsites.html> (last accessed 2014/02/03) extended by a set of 10 *cis*-elements described in literature to be  
184 involved in auxin response/signaling (Tab. S2). Motifs shorter than six bases were excluded from the analysis. The sequences of the motifs were used as regular

186 expressions to compute their occurrences in the promoter sequences.

### *Determination of promoter and expression divergence*

188 Similarities of promoter sequences of an orthologous gene pair was assessed by  
determining the occurrence of each possible 8-mer in each of the two promoter  
190 sequences and computing the Pearson correlation coefficient of the two vectors of  
k-mer counts (*kmer.r*) as proposed in (Vinga and Almeida, 2003). Promoter  
192 divergence was assessed as 1-*kmer.r* and expression divergence was determined  
as 1-*mod.r*.

### *De-novo identification of putative cis-elements*

Dimont (Grau *et al.*, 2013) was used for identification of putative novel *cis*-  
196 elements with slight modifications from the published procedure which are  
comprehensively described in the Supplemental Methods Section.

### *Co-expression Analysis using Profile Interaction Finder (PIF)*

The *Profile Interaction Finder* algorithm (PIF; Poeschl *et al.*, 2014)) was applied in  
200 its second mode using eight input profiles of the individual mean expression  
profiles of the eight *AUX/IAA* gene clusters. We applied the PIF to the set of genes  
202 showing a  $cv > 0.05$  to prevent false-positive correlation based on noise.  
Parameters and thresholds for the identification of positively or negatively  
204 correlated genes were set to a |PIF-correlation| of  $> 0.7$ , neighbor number  $k = 1$   
and a 75 % bootstrap occurrence ( $n=1000$ ). The PIF was additionally applied to  
206 nine input profiles of an intra-species *AUX/IAA* gene clusters analysis using the  
same conditions as for the inter-species analysis described prior.

### *Statistical and computational analyses*

Analyses were performed using the software R (R Core Team, 2015) with  
210 implementation of the following packages: beeswarm (Eklund, 2015), gplots  
(Warnes *et al.*, 2014), st (Opge-Rhein and Strimmer, 2007), multtest (Pollard *et al.*, 2005).  
212

### *Accession numbers*

214 The cross-species hybridization microarray data analyzed in this article are



publicly available at

216 <http://data.iplantcollaborative.org/quickshare/8e9b2f0212c8a1bc/Exp579.zip>.

## Results and Discussion

218 We inspected inter-species variation of auxin responses between *A. thaliana* and  
 220 *A. lyrata* taking advantage of the close relation of the two *Arabidopsis* species  
 222 which extensive synteny despite considerable genetic variation, for example in  
 224 total genome size (Hu *et al.*, 2011). The aim was to combine physiological,  
 226 transcriptomic and genomic information to assess the extent of inter-species  
 variation in auxin responses on several levels and to identify genes with conserved  
 transcriptional responses. Furthermore, we wanted to exploit the genetic variation  
 among the two sister species to gain further insights into the molecular  
 mechanisms that contribute to naturally occurring variation in auxin responses  
 which might ultimately reflect consequences of adaptation processes.

### 228 *Physiological auxin responses*

To assess whether *A. thaliana* and *A. lyrata* show differences in physiological  
 230 auxin responses, we used classic auxin response assays that focus on the  
 quantitative reaction of seedling growth to exogenously applied auxin or to a  
 232 temperature-induced increase of endogenous auxin levels. We performed several  
 of these assays, testing the response to the naturally prevalent auxin indole-3-  
 234 acetic acid (IAA) as well as several synthetic auxins, to assess the extent of  
 natural inter-species variation between *A. thaliana* and *A. lyrata*.

236 In terms of relative growth effects, a high diversity in responses to natural and  
 synthetic auxins was observed (Fig. 1A-D). While *A. thaliana* is less sensitive with  
 238 respect to IAA-induced root growth inhibition (Fig. 1A), a higher sensitivity in  
 temperature-induced hypocotyl elongation (TIHE) was observed (Fig. 1D). *A.*  
 240 *thaliana*'s response to the synthetic auxin 2,4-Dichlorophenoxyacetic acid (2,4-D)  
 was significantly stronger than the response of *A. lyrata* (Fig. 1B). In contrast, 1-  
 242 Naphthaleneacetic acid (1-NAA)-induced root growth inhibition was almost similar  
 in both species (Fig. 1C). Overall, the extent of variation in auxin responses  
 244 between *A. thaliana* and *A. lyrata* seems to be highly dependent on the specific  
 auxinic compound and the analyzed organ. The compound- and tissue-specificity  
 246 might indicate differential sources for the observed response differences putatively



involving any or all aspects of auxin biology ranging from biosynthesis (in case of  
248 TIHE) to transport, sensing, signal transduction and/or metabolism.

### *Microarray-based transcriptional profiling of auxin responses*

250 For *A. thaliana*, natural variation among different accessions was observed on  
physiological as well as on transcriptional levels (Delker *et al.*, 2010). We thus  
252 conducted a microarray-based analysis of transcriptional auxin responses  
comparing *A. thaliana* and *A. lyrata* using a cross-species hybridization approach.  
254 We chose the same experimental set up as in previously reported transcriptome  
profiling studies in *Arabidopsis thaliana*  
256 (Nemhauser *et al.*, 2006; Delker *et al.*, 2010) to maximize comparability among  
available data. In brief, seven days-old seedlings grown in liquid culture were  
258 treated with 1  $\mu$ M IAA for one and three hours, respectively. Isolated RNAs from  
treated and control (untreated) seedlings were subsequently processed and  
260 hybridized to the Affymetrix ATH1 microarray. To exclude potential effects of  
differential auxin uptake on the transcriptional read-out, we quantified the amount  
262 of radio-labeled auxin in seven days-old seedlings exposed to [ $^3$ H]-IAA for one  
hour (Fig. 2A, Supplemental Fig. S1G). The lack of statistically significant  
264 differences in [ $^3$ H]-IAA levels indicated similar IAA uptake capacities in *A. thaliana*  
and *A. lyrata*. To further omit putative effects of differential internal transport we  
266 applied IAA in a concentration (1  $\mu$ M) that is high enough to ensure saturation.  
The hybridization of a non-intended species to a species-specific microarray  
268 requires a probe-masking procedure in the processing of the expression data to  
avoid false-positive and false-negative results caused by mis-hybridization of  
270 probes due to sequence variations between the two species. Here, a sequence-  
based masking approach was applied that allows for one mismatch per probe and  
272 retained only those genes that are represented by at least three probes per probe  
set and uniquely hybridize to orthologous genes in *A. thaliana* and *A. lyrata*  
274 (Poeschl *et al.*, 2013). As a result of the masking procedure, 16315 genes were  
retained for expression comparisons between *A. thaliana* and *A. lyrata*. To correct  
276 for putative effects of one tolerated mismatch per probe on the expression level we  
implemented a fourth-degree polynomial correction option in the RMA-normalizing  
278 procedure as suggested by Poeschl *et al.* (2013). After normalization we inspected  
the expression levels of various constitutively expressed genes designated as

280 superior expression reference genes in *A. thaliana* (Czechowski *et al.*, 2005) This  
subset of genes showed similar transcription profiles as well as largely similar  
282 expression levels in both *Arabidopsis* species indicating the comparability of the  
two data sets (Fig. S2).

284 To analyze auxin-induced transcriptome changes, differentially expressed genes in  
both species were identified based on a significant ( $\text{fdr} < 0.05$ ) change in  
286 expression with a  $|\log_2 \text{fold change}| > 1$ . Several hundred genes were differentially  
regulated in response to auxin in both species (Fig. 2B). Considerably more genes  
288 were differentially regulated in *A. thaliana* in response to one hour of auxin  
treatment than in *A. lyrata*, whereas after three hours more genes were responsive  
290 in *A. lyrata*. Overall, the number of down-regulated genes was relatively high in  
comparison to other auxin response transcriptome analyses (Paponov *et al.*, 2008;  
292 Delker *et al.*, 2010) In accordance with previous studies, we focused primarily on  
differentially up-regulated genes in the subsequent analyses. To further assess  
294 whether a time-delay in response may be a factor in creating the diverse response  
pattern we performed cross-comparison among the up-regulated genes after 1 h in  
296 *A. thaliana* and 3 h in *A. lyrata* (and vice versa). In case of a delayed response a  
considerable increase in the overlapping genes should occur in one of the cross-  
298 comparisons. However, as this is not the case (Supplemental Fig. S1H,  
Supplemental Data File S1), we conclude that delays in the response are of minor  
300 relevance for the differences observed among the transcriptome responses.

### *Identification of conserved response genes*

302 Several gene families are known to be up-regulated by elevated auxin levels in *A.*  
*thaliana* (Paponov *et al.*, 2008). The cross-species approach might provide further  
304 insights into the identity of genes that are conserved in their response to auxin and  
might thus be of particular importance for auxin signaling, metabolism and/or  
306 response. The intersection of up-regulated genes among the two *Arabidopsis*  
species was moderate at both time points (Fig. 2C). Among the commonly up-  
308 regulated genes were individual members of prominent auxin response gene  
families such as the *ASYMMETRIC LEAVES/LATERAL ORGAN BOUNDARIES*  
310 *DOMAIN* (*ASL/LBD*), *GRETCHEN HAGEN 3* (*GH3*), *AUX/IAA* and *SMALL AUXIN*  
*UPREGULATED* (*SAUR*) families (Tab. 1 and Tab. S1), validating the successful  
312 auxin induction. In addition, numerous other genes were induced by auxin

treatment in both species. This included known auxin-responsive genes (e.g. *ARABIDOPSIS THALIANA* HOMEBOX 2 (*HAT2*)/*AT5G47370*), genes associated with other phytohormones (e.g. 1-AMINOCYCLOPROPANE-1-CARBOXYLATE SYNTHASE 11 (*ACS11*)/*AT4G08040*, BRASSINOSTEROID INSENSITIVE LIKE 3 (*BRL3*)/*AT3G13380*, GIBBERELLIN 2-OXIDASE 8 (*GA2ox8*)/*AT4G21200*) as well as several genes with so far unknown function (e.g. *AT1G29195*, *AT1G64405*, etc). The latter group might be of particular interest as the conserved response to the auxin stimulus in both species might indicate potential new candidate genes relevant for auxin responses.

### Inter-species expression responses in auxin-relevant gene families

To further investigate similarities and specificities of transcriptional auxin responses in *A. thaliana* and *A. lyrata*, we performed a cluster analysis of genes that showed a change in expression in at least one species at any of the analyzed time points with a coefficient of variation (cv) > 0.05. A modified Pearson correlation (*mod.r*) was used as a distance measure in the hierarchical clustering to incorporate information on the variation among the three biological replicates at each analyzed time point. To filter for correlations among genes with potential biological relevance, we further applied a minimum cut-off in correlation of *mod.r* = 0.7. The resulting 14 gene clusters fall into two clearly distinct groups (Fig. 3). Clusters 1 - 8 and clusters 9 - 14 are predominantly characterized by genes that show a higher expression level and/or response in *A. lyrata* or *A. thaliana*, respectively. Only very few clusters show high similarities among the expression profiles of both species (e.g. cluster 2 and 9). The majority of cluster profiles show small to striking differences between the two species in either expression levels (e.g. cluster 8) or expression response in terms of induction/repression profiles (e.g. cluster 3) or both (e.g. cluster 11). We next inspected whether the presence and frequency of known *cis*-regulatory elements in the promoters of clustered genes could explain the observed patterns of similarities or differences in the expression profiles of individual clusters. We limited the size of the putative promoter region to 500 bp upstream of the transcription start site. While eukaryotic promoters can arguably be much larger, the majority of *cis*-regulatory sequences should be present within this 500 bp interval (Franco-Zorrilla *et al.*, 2014). We analyzed the presence of 99 known *cis*-regulatory elements taken from the

346 *Arabidopsis* *cis*-regulatory element database (<http://arabidopsis.med.ohio-state.edu/AtcisDB/>) and additional literature (Tab. S2). Of the total number of  
348 motifs ( $n = 109$ ) 35 known *cis*-elements were detected in at least one of the promoter sequences of clustered genes with significantly altered expression (Tab.  
350 S3). To assess whether the presence of certain regulatory sequences explains the distinct expression profiles, we initially focused on *cis*-elements known or  
352 predicted to be involved in auxin responses such as different varieties of the auxin responsive element (AuxRE), the E-box/hormone up at dawn (HUD) element and  
354 the TGA2 binding site motif (Liu *et al.*, 1994; Nemhauser *et al.*, 2004; Vert *et al.*, 2008; Keilwagen *et al.*, 2011).

356 Auxin-related *cis*-regulatory elements were detected in all of the clusters. There was a certain degree of redundancy in the analysis due to sequence overlaps  
358 among different variants of elements, e.g., in various versions of the AuxRE (Nos. 11, 18, and 20; Fig. 3, Tab. S3). Yet, neither the frequency of AuxREs nor any  
360 other *cis*-element seemed to explain the similarities or differences in the expression behavior (i.e., auxin response pattern) of the gene clusters (Fig. 3, Fig.  
362 S3). Even for cluster 9, which shows clearly up-regulated profiles in both species and includes several prominent auxin-responsive genes, only roughly 50% of the  
364 genes contained a version of the AuxREs. This observation is in accordance with several previous studies in *A. thaliana* which showed a lack of AuxREs in a  
366 substantial number of auxin-regulated genes (Nemhauser *et al.*, 2004). Furthermore, expression differences among *A. thaliana* and *A. lyrata* did not show  
368 a clear pattern of correlation to the species-specific presence of individual regulatory elements in the promoters of *A. thaliana* (gray) or *A. lyrata* (green).  
370 However, these observations remain subjective as statistical tests for over- or under-representation of elements are hindered by the low number of genes  
372 present in several of the clusters identified here.

### *Expression divergence vs. promoter divergence*

374 The lack of any obvious correlation of known *cis*-elements and auxin-induced expression patterns prompted a *de novo* search for putative regulatory sequences.  
376 The data set seemed ideal as the two *Arabidopsis* species are distant enough to provide considerable sequence variation in promoter regions while providing  
378 sufficient similarities to allow for local alignments of the sequences (Hu *et al.*,

2011). However, a prerequisite for this approach would be a general correlation  
 380 between the diversity in the promoter sequence and the differences detected on  
 the expression level. To evaluate this assumption, we compared promoters of  
 382 three groups of genes: (i) the set of conserved genes with a significant induction in  
 expression in response to 1 h of auxin treatment in both species ( $n = 68$ ), (ii)  
 384 promoters of genes that are up-regulated in at least one of the analyzed species  
 ( $n = 297$ ), which include also the 68 genes of group (i) that met the threshold of  
 386 auxin-induction in both species. We retained this gene set in group (ii) as the  
 kinetics of expression profiles might still show differences among the two species.  
 388 Group (iii) included neutral genes that did not show a significant alteration in  
 expression as a control set ( $n = 11195$ ). We then calculated the expression  
 390 divergence of expression profiles between each orthologous gene pair using  
*mod.r*. Similarities of promoter sequences were assessed by a sliding window  
 392 approach to compute the correlation of the occurrence of all possible 8-mers  
 across the promoters of orthologous genes (*kmer.r*, Vinga and Almeida, 2003).  
 394 As expected, expression divergence for genes with a conserved up-regulation in  
 both species is rather low and seems to be independent of promoter divergences  
 396 (Fig. 4A). Similarly, no correlation among expression and promoter divergence was  
 observed for neutral genes that did not show expression changes in response to  
 398 auxin. However, for group (ii) including all genes with a differential response in at  
 least one of the two analyzed species, a wide range in expression divergence as  
 400 well as promoter divergence was observed which showed a considerably higher  
 correlation compared to the other two gene sets (Fig. 4A). Hence, both auxin-  
 402 responsive gene sets showed the expected pattern of relationships between  
 expression and promoter divergence, which made them suitable candidate sets for  
 404 *de novo* identification of regulatory promoter elements.

#### *De novo identification of putative cis-regulatory elements*

406 Based on the promoter divergence analysis we selected two gene sets for motif  
 discovery (positive data sets). The first set comprised an extended set of genes  
 408 that were induced in both species after 1 h of auxin treatment. As we did not limit  
 the selection by filtering via corrected p-values, this set extended the previously  
 410 shown set of genes of up-regulated in both species to a total of 81 orthologous  
 gene pairs. Data set 2 comprises promoters of an extended set of genes that were

up-regulated in at least one species. For this second data set we only included the promoter sequence of the species that showed a significant up-regulation of a gene in response to auxin (n = 845 promoter sequences). The corresponding promoter sequence of the other species of an orthologous gene pair was included in the control data set 2 following the rationale that regulatory elements required for the auxin response are absent in this case.

Applying the discriminative motif discovery tool *Dimont* (Grau *et al.*, 2013), we identified motifs with significant over-representation in each of the two data sets of auxin-induced genes in comparison to their respective control data sets (see Methods for details). Among the motifs identified in both data sets were sequences with high to medium similarities to TATA box elements (Fig. 4B, motifs A - C). TATA boxes are present in approximately 28 % of all *Arabidopsis* genes with a predominance of non-housekeeping genes (Molina and Grotewold, 2005). Interestingly, yeast genes containing a TATA box showed increased inter-species variation in expression responses to a variety of environmental stresses (Tirosh *et al.*, 2006). It was hypothesized that core promoters including a TATA box might be more sensitive to genetic perturbations and could be a driving factor in expression divergence (Tirosh *et al.*, 2006). As TATA-like elements were enriched in both analyzed data sets they might rather reflect the general rapid and partially strong induction of these genes in response to an external stimulus. In yeast, TATA-containing promoters showed a slightly higher tendency for higher expression after a heat shock (Kim and Iyer, 2004). The identification of novel variants of AuxRE- and HUD-like motifs (Fig. 4B, motifs D - F) corresponds with their previously demonstrated function in auxin-mediated expression induction (Walcher and Nemhauser, 2012) and indicates a general success in the analytical approach. The identification of these putatively novel variations of known elements may indicate a higher tolerance for sequence variation in the *cis*-regulatory motif that only becomes evident with a higher degree of genetic variation among genome sequences included in this analysis. Recent advances in understanding the mode of ARF transcription factor binding to target promoter sequences substantiates this assumption. Structure-function analysis indicated that different ARF proteins seem to have altered affinities for different variations of AuxREs (Boer *et al.*, 2014). These specificities could account at least partially for functional specifications of



individual ARFs and might also be a contributing factor in natural variation of transcriptional auxin responses.

In addition, other putatively novel *cis*-regulatory sequences were found to be significantly enriched in genes that were induced by auxin in both species (Fig. 4 and Fig. S4, motifs G - L). To the best of our knowledge, these sequences have not been described previously. To assess the potential significance of these elements with respect to auxin responses, we tested whether they were also enriched in auxin-induced genes in an independent auxin response transcriptome dataset generated for *A. thaliana* seedlings (Nemhauser *et al.*, 2006). Two of the sequences (Fig. 4B, motifs G + H) were indeed found to be enriched significantly ( $p < 0.05$ ) in differentially expressed genes in this additional data set (Fig. S4), highlighting their potential relevance for auxin-induced transcriptional regulation. We then inspected whether the presence/absence of any of the *de novo*-identified promoter sequences can account for the differential expression responses or levels of distinct gene clusters (Fig. S3). However, similarly to the analysis of previously described *cis*-elements, no coincidence pattern of *de novo* promoter elements and expression response could be identified despite the enrichment of these sequences in auxin-regulated genes. While we cannot exclude that the newly identified promoter sequences may be of minor functional relevance, the analysis as a whole rather points towards a highly complex orchestration of auxin-induced expression responses involving multiple *cis*-element variations.

The diversity in auxin-induced expression responses via combinations of multiple different transcription factors and their individual target promoter sequences has been shown previously in case of the AuxRE and HUD elements which seem to be acting interdependently in facilitating efficient ARF binding (Walcher and Nemhauser, 2012). G-box and Myb-binding motifs have similarly been described to function as components in composite AuREs (Ulmasov *et al.*, 1995) and ABRE-like and Y-patch motifs have recently been identified in a bioinformatics approach as putative constituents of composite AuxREs (Mironova *et al.*, 2014). Composite AuxREs may be integral to form the auxin code and it is possible that several as yet uncharacterized motifs contribute to the diversity. Furthermore, different types of AuxREs seem to contribute differentially to transcriptional auxin responses (Zemlyanskaya *et al.*, 2016), putatively via preferential binding of inducing or



478 repressing ARFs. While the well known canonical AuxRE TGTCTC is found in the  
regulatory regions of up-regulated genes of the early auxin response (0.5 - 2 h),  
480 the motif TGTCAT is found in down-regulated genes of the late (4 - 24 h) auxin  
response. The motif TGTCGG is not as strongly restricted to specific conditions as  
482 it is found in up-regulated genes of both the early and late auxin response  
(Zemlyanskaya *et al.*, 2016).

484 Unraveling the combinatorial code of regulatory elements will require highly  
sophisticated bioinformatic approaches, a higher number of transcription profile  
486 data sets from diverse genetic backgrounds and preferably from distinct tissue  
sets for in-depth phylogenetic footprinting analyses and ultimately extensive  
488 functional validation.

While the complex promoter code of auxin-induced transcriptional variation  
490 remains somewhat elusive, the general hierarchy of the auxin signal transduction  
pathway is well known. Transcriptional responses to auxin are primarily mediated  
492 via the TIR1/AFB-AUX/IAA-ARF signaling pathway. All three components are  
encoded by gene families. Individual members of these families seem to have  
494 partial redundancies in their spatio-temporal expression patterns and have at least  
partially distinct biochemical properties (Okushima *et al.*, 2005; Paponov *et al.*,  
496 2008; Parry *et al.*, 2009; Rademacher *et al.*, 2011; Calderón Villalobos *et al.*,  
2012). As quantitative alterations in the equilibrium of these signaling components  
498 may significantly affect downstream responses, we next focused on this particular  
group of genes.

#### 500 *Divergence of AUX/IAA gene expression is reflected in downstream responses*

Diversity in co-expression profiles of signaling components have previously been  
502 shown among different accessions of *A. thaliana* (Delker *et al.*, 2010). Variation in  
gene expression levels and co-expression patterns are indicative of altered levels  
504 of individual signaling proteins that might contribute to the differential responses  
observed initially on transcriptional and ultimately on physiological levels (Delker  
506 *et al.*, 2010). Differential expression was predominantly evident for *AUX/IAA* genes  
which are generally more responsive to auxin treatment than *ARFs* or *TIR1/AFBs*  
508 (Paponov *et al.*, 2008). Variation of *AUX/IAA* transcriptional activation is indicative  
of differential signal transduction events in response to a similar stimulus.

510 *AUX/IAA* genes constitute primary auxin response genes that provide a read-out  
for the activation of the auxin signal transduction pathway. Subsequent alterations  
512 in *AUX/IAA* protein levels will likely impact further on auxin sensing by affecting the  
availability of individual auxin co-receptor complexes with potentially specific auxin  
514 sensitivities. Preferential formation of specific ARF-*AUX/IAA* heteromerizations  
may additionally affect transcriptional regulation. As such, the intra-specific  
516 comparison of auxin-regulated expression responses in *A. thaliana* accessions  
highlighted the early auxin signaling network as a potential source for the  
518 observed variation in downstream responses (Delker *et al.*, 2010). In this study, we  
challenged this hypothesis by inspecting the expression responses of the core  
520 auxin signaling gene families in the cross-species comparison of auxin responses.

Members of all three gene families showed differential expression responses  
522 between the two species. Analysis of expression and promoter divergences  
showed a considerably stronger correlation for the highly auxin-responsive  
524 *AUX/IAA* gene family (Fig. 5A). This might be similar for the *TIR/AFB* family but the  
total number of only four genes retained in this analysis is too low and effects by  
526 individual outliers may be high. While promoter divergences of *ARF* family  
members are also quite high, expression divergence is only low to medium (1-  
528 *mod.r* values in expression divergence from 0-1, Fig. 5A). *AUX/IAAs* have a  
unique role among the signaling components. Apart from their dual function in  
530 signaling as repressors of ARF transcription factors and co-receptors of auxin,  
they also constitute a group of classic and conserved auxin response genes which  
532 provide a readout for auxin responsiveness (Tab. 1, Paponov *et al.*, 2008). Due to  
this prominent role, we inspected the expression responses of the *AUX/IAA* gene  
534 family in more detail. Hierarchical clustering allowed the identification of *AUX/IAA*  
subgroups based on the correlation (1-*mod.r*) in expression profiles (Fig. 5B).  
536 While clusters 1 - 3 contained *AUX/IAA* genes that were induced by auxin only in  
*A. lyrata*, clusters 5 - 8 *AUX/IAA* genes responded primarily in *A. thaliana*. In  
538 contrast, cluster 4 contained *AUX/IAA* genes that showed significantly changed  
expression levels in response to auxin treatment in both species. These genes are  
540 part of the conserved auxin response gene set (Tab. 1) and form the largest  
cluster among the *AUX/IAA* genes (Fig. 5B). Consequently, *AUX/IAA* genes with  
542 similar expression profiles in *A. thaliana* and *A. lyrata* are indicative for similar

upstream transcriptional activation/signaling events and their corresponding gene products can be speculated to have similar downstream signaling effects. In contrast to that, gene clusters with species-specific auxin responses could be indicative for the sources of natural variation seen in downstream auxin responses.

To identify genes with expression profiles that are either positively or negatively correlated to individual *AUX/IAA* gene clusters (Data file S2), we used the recently introduced *Profile Interaction Finder (PIF)* algorithm (Poeschl *et al.*, 2014). As expected, members of several of the classic and conserved auxin response gene families showed positively correlated expression profiles to cluster 4 (Fig. 5C). This cluster shows a classic response profile of transient expression induction in both species. The respective *AUX/IAA* and co-regulated genes of known auxin-related genes seem to be part of a conserved auxin response in both species.

Clusters with more species-specific expression responses also showed correlations with genes relevant for auxin biology. For example, the expression profile of cluster 7 shows a higher expression and gradual auxin induction in *A. thaliana*, while the expression levels in *A. lyrata* are generally lower. A similar, positively correlated pattern in expression was observed for several auxin-relevant genes ranging from biosynthesis (*ASA2*), to signaling (*ARF16*), transport (*PIN4*, *PIN7*), and response (*EXPANSIN A1*). In addition, genes with negatively correlated expression profiles were also identified (e.g. *ASL/LBD25*).

To assess the wider implications of *AUX/IAA* expression variation for downstream response patterns, we compared the inter-species variation of this data set with the intra-species variation among seven *A. thaliana* accessions of a previous analysis (Delker *et al.*, 2010). Expression divergence of *AUX/IAA* genes revealed a group of *AUX/IAAs* with highly conserved expression responses corresponding primarily to genes sorted to cluster 4 (Fig. 5B, Fig. 6A). Other genes showed higher and similar inter- and intra-species divergence (e.g. *AUX/IAA20* and 34). Finally, a group of 5 *AUX/IAA* genes showed a higher diversity in the comparison among *A. thaliana* and *A. lyrata* than in the intra-species comparison. These genes cause a considerable increase in the inter-species divergence on *AUX/IAA* level (Fig. 6A).

To account for potential differences in cluster structures, *AUX/IAA* genes were

independently clustered based on their expression behavior in the seven *A. thaliana* accessions (Fig. 6B). As one of the prerequisites in gene selection was a  $cv > 0.05$ , only 19 *AUX/IAA* genes remained in the intra-specific cluster analysis whereas *AUX/IAA* 9, 18 and 26 did not show auxin-induced changes in expression profiles. We marked the new cluster with an “\*” to differentiate between the two cluster analyses. The largest cluster (cluster 5\*) again is formed by *AUX/IAAs* showing a uniform transient induction of expression. This cluster largely corresponds to genes grouped in cluster 4 of the inter-species comparison but includes additional genes (e.g., *AUX/IAA* 30) which clustered differently in the other data set. Apart from the conserved cluster, other *AUX/IAAs* show differential expression patterns in different accessions and seem to be highly variable in their response which may contribute to differential downstream responses (Fig. 6B). To assess potential implications on downstream responses, we searched for positively and negatively correlated genes using the *PIF* algorithm. We focused on cluster 5\* here, as the constitution and expression profiles of the genes were comparable to cluster 4 in the inter-species comparison (Fig. 5B, Fig. 6B). Similar to the previous analysis, a number of known auxin-responsive genes were identified to be either positively or negatively correlated to cluster 5\* (Supplemental Data set 2). Comparing the lists of cluster 4 and cluster 5\* showed a high overlap in the positively correlated genes (Fig. 6C) and a much lower overlap in negatively correlated genes. Yet, both lists contain known auxin-responsive genes and even more interesting, genes which have not been characterized or linked to auxin so far (Fig. 6D). The fact that these genes show a reproducible strong correlation with classic auxin response genes may indicate a function in auxin biology that awaits unraveling.

The correlation of numerous auxin-associated genes with *AUX/IAA* gene clusters indicates that variation in early auxin signaling may penetrate to downstream response levels. Ultimately, these differences could quantitatively contribute to the variation observed on physiological levels. Whether the major source of variation is actually caused by differential expression or rather by altered biochemical properties due to non-synonymous mutations of signaling genes remains to be elucidated. The genome-wide variation in auxin-induced gene expression may originate in the differential gene regulation and subsequent protein levels of

AUX/IAAs themselves. Alternatively and/or in addition, differential upstream events  
 610 such as auxin sensing or initial gene activation by ARFs may be the actual source  
 of initial variation which then results in differential activation of *AUX/IAAs* and other  
 612 genes.

### Summary and conclusions

614 We studied inter-species variation of physiological and transcriptional auxin  
 responses to assess whether the highly conserved auxin signaling and response  
 616 pathway might contribute to adaptive processes in growth and development.  
 Transcriptome analysis allowed the identification of genes with a highly conserved  
 618 response to the auxin treatment which included both, members of known auxin-  
 responsive gene families and so far uncharacterized genes. However, the majority  
 620 of differentially expressed genes in response to auxin showed significant variation  
 in expression levels and/or response patterns between the two *Arabidopsis*  
 622 species. Neither similar nor species-specific expression patterns of auxin-  
 regulated gene clusters could be explained by the presence of individual known or  
 624 *de novo*-identified promoter elements. Thus, it remains likely that a complex code  
 of element combinations accounts for the diversity in transcriptional auxin  
 626 responses. Breaking this particular code will require extensive efforts by  
 bioinformaticians and far more available expression data from genetically diverse  
 628 backgrounds.

A significant source for variation in auxin-induced transcriptome changes likely  
 630 originates within the initial auxin signal transduction pathway itself. Distinct  
 patterns of *AUX/IAA* gene cluster expressions were found to penetrate to the level  
 632 of numerous response genes, many of which with a known functional relevance for  
 auxin biology. While *AUX/IAA* gene expression divergence may contribute directly  
 634 to differential activation of downstream responses, it is also indicative for species-  
 specific differences by which identical auxin signals are transduced into gene  
 636 expression responses. Consequently, the triumvirate of TIR1/AFBs, *AUX/IAAs*,  
 and ARFs harbor significant potential for the initiation of variation in downstream  
 638 auxin signaling and response.

## 640 **Supplemental Material**

**Supplemental Methods:** Comprehensive description of *de novo* identification of  
642 *cis*-elements

**Supplemental Tab. S1:** Expression response of conserved auxin up-regulated  
644 genes in *A. thaliana* and *A. lyrata*

**Supplemental Tab. S2:** collection of known *cis*-regulatory elements

646 **Supplemental Tab. S3:** *cis*-regulatory elements identified in significantly up-  
regulated genes

648 **Supplemental Data File S1:** Tables of common and species-specific up-regulated  
genes including cross-comparisons

650 **Supplemental Data File S2:** Profile interaction finder results for genes positively  
or negatively correlated with *AUX/IAA* gene clusters

**Supplemental Fig. S1:** Absolute lengths in physiological auxin responses, growth  
dynamics, auxin uptake and cross-comparison of up-regulated genes

652 **Supplemental Fig. S2:** Expression levels of non-responsive reference genes  
confirm successful normalization of the cross-species microarray data

**Supplemental Fig. S3:** Assignment of 35 known and 8 *de novo*-identified *cis*-  
elements to auxin-regulated gene clusters

**Supplemental Fig. S4:** *De novo*-identified *cis*-elements

## 654 **Acknowledgements**

This work was supported by the Deutsche Forschungsgemeinschaft (Qu 141/3-1  
656 to MQ) and by core funding of the Leibniz association. We furthermore thank Ivo  
Grosse for fruitful discussions in the initial project phase.

## 658 **References**

**Boer DR, Freire-Rios A, van den Berg WAM, et al.** 2014. Structural Basis for DNA  
Binding Specificity by the Auxin-Dependent ARF Transcription Factors. *Cell* **156**, 577–589.

**Calderon Villalobos LIA, Lee S, De Oliveira C, et al.** 2012. A combinatorial TIR1/AFB-  
Aux/IAA co-receptor system for differential sensing of auxin. *Nature Chemical Biology* **8**,  
477–485.

**Calderón Villalobos LIA, Lee S, De Oliveira C, et al.** 2012. A combinatorial TIR1/AFB-



- Aux/IAA co-receptor system for differential sensing of auxin. *Nature Chemical Biology* **8**, 477–485.
- Chapman EJ, Estelle M.** 2009. Mechanism of Auxin-Regulated Gene Expression in Plants. *Annual Review of Genetics* **43**, 265–85.
- Czechowski T, Stitt M, Altmann T, Udvardi MK, Scheible W-R.** 2005. Genome-wide identification and testing of superior reference genes for transcript normalization in Arabidopsis. *Plant Physiology* **139**, 5–17.
- Delker C, Pöschl Y, Raschke A, Ullrich K, Ettingshausen S, Hauptmann V, Grosse I, Quint M.** 2010. Natural variation of transcriptional auxin response networks in Arabidopsis thaliana. *Plant Cell* **22**, 2184–2200.
- Dharmasiri N, Dharmasiri S, Estelle M.** 2005. The F-box protein TIR1 is an auxin receptor. *Nature* **435**, 441–445.
- Eklund A.** 2015. *beeswarm: The Bee Swarm Plot, an Alternative to Stripchart*. <http://CRAN.R-project.org/package=beeswarm>
- Franco-Zorrilla JM, López-Vidriero I, Carrasco JL, Godoy M, Vera P, Solano R.** 2014. DNA-binding specificities of plant transcription factors and their potential to define target genes. *Proceedings of the National Academy of Sciences USA* **111**, 2367–2372.
- Grau J, Posch S, Grosse I, Keilwagen J.** 2013. A general approach for discriminative de novo motif discovery from high-throughput data. *Nucleic Acids Research* **41**, e197–e197.
- Guilfoyle T, Ulmasov T, Hagen G.** 1998. The ARF family of transcription factors and their role in plant hormone-responsive transcription. *Cellular and Molecular Life Sciences* **54**, 619–627.
- Hu TT, Pattyn P, Bakker EG, et al.** 2011. The Arabidopsis lyrata genome sequence and the basis of rapid genome size change. *Nature Genetics* **43**, 476–481.
- Kato H, Ishizaki K, Kouno M, Shirakawa M, Bowman JL, Nishihama R, Kohchi T.** 2015. Auxin-Mediated Transcriptional System with a Minimal Set of Components Is Critical for Morphogenesis through the Life Cycle in Marchantia polymorpha. *PLoS Genetics* **11**, e1005084.
- Keilwagen J, Grau J, Paponov IA, Posch S, Strickert M, Grosse I.** 2011. De-Novo Discovery of Differentially Abundant Transcription Factor Binding Sites Including Their Positional Preference. *PLoS Comput Biol* **7**, e1001070.
- Kepinski S, Leyser O.** 2005. The Arabidopsis F-box protein TIR1 is an auxin receptor. *Nature* **435**, 446–451.
- Kim J, Iyer VR.** 2004. Global Role of TATA Box-Binding Protein Recruitment to Promoters in Mediating Gene Expression Profiles. *Molecular and Cellular Biology* **24**, 8104–8112.
- Lincoln C, Britton J, Estelle M.** 1990. Growth and development of the axr1 mutants of Arabidopsis. *The Plant Cell* **2**, 1071–1080.
- Liu ZB, Ulmasov T, Shi X, Hagen G, Guilfoyle TJ.** 1994. Soybean GH3 promoter contains multiple auxin-inducible elements. *The Plant Cell* **6**, 645–57.
- Maraschin F dos S, Memelink J, Offringa R.** 2009. Auxin-induced, SCF(TIR1)-mediated



poly-ubiquitination marks AUX/IAA proteins for degradation. *The Plant Journal* **59**, 100–109.

**Mironova VV, Omelyanchuk NA, Wiebe DS, Levitsky VG.** 2014. Computational analysis of auxin responsive elements in the *Arabidopsis thaliana* L. genome. *BMC Genomics* **15**, 1–14.

**Molina C, Grotewold E.** 2005. Genome wide analysis of *Arabidopsis* core promoters. *BMC Genomics* **6**, 25.

**Nemhauser JL, Hong F, Chory J.** 2006. Different Plant Hormones Regulate Similar Processes through Largely Nonoverlapping Transcriptional Responses. *Cell* **126**, 467–475.

**Nemhauser JL, Mockler TC, Chory J.** 2004. Interdependency of Brassinosteroid and Auxin Signaling in *Arabidopsis*. *PLoS Biology* **2**, e258.

**Okushima Y, Overvoorde PJ, Arima K, et al.** 2005. Functional Genomic Analysis of the AUXIN RESPONSE FACTOR Gene Family Members in *Arabidopsis thaliana*: Unique and Overlapping Functions of ARF7 and ARF19. *The Plant Cell* **17**, 444–463.

**Oppen-Rhein R, Strimmer K.** 2007. Accurate ranking of differentially expressed genes by a distribution-free shrinkage approach. *Statistical Applications in Genetics and Molecular Biology* **6**, Article 9.

**Paponov IA, Paponov M, Teale W, Menges M, Chakrabortee S, Murray JAH, Palme K.** 2008. Comprehensive Transcriptome Analysis of Auxin Responses in *Arabidopsis*. *Molecular Plant* **1**, 321–337.

**Parry G, Calderon-Villalobos LI, Prigge M, Peret B, Dharmasiri S, Itoh H, Lechner E, Gray WM, Bennett M, Estelle M.** 2009. Complex regulation of the TIR1/AFB family of auxin receptors. *Proceedings of the National Academy of Sciences USA* **106**, 22540–22545.

**Poeschl Y, Delker C, Trenner J, Ullrich KK, Quint M, Grosse I.** 2013. Optimized Probe Masking for Comparative Transcriptomics of Closely Related Species. *PLoS ONE* **8**, e78497.

**Poeschl Y, Grosse I, Gogol-Döring A.** 2014. Explaining gene responses by linear modeling. German Conference on Bioinformatics **Volume P-235 of Lecture Notes in Informatics (LNI)-Proceedings**, 27–35.

**Pollard KS, Dudoit S, van der Laan MJ.** 2005. *Multiple Testing Procedures: R multtest Package and Applications to Genomics, in Bioinformatics and Computational Biology Solutions Using R and Bioconductor*. Springer.

**Quint M, Gray WM.** 2006. Auxin signaling. *Current Opinion in Plant Biology* **9**, 448–453.

**R Core Team.** 2015. *R: A Language and Environment for Statistical Computing*. Vienna, Austria: R Foundation for Statistical Computing. <https://www.R-project.org>

**Rademacher EH, Möller B, Lokerse AS, Llavata-Peris CI, van den Berg W, Weijers D.** 2011. A cellular expression map of the *Arabidopsis* AUXIN RESPONSE FACTOR gene family. *The Plant Journal* **68**, 597–606.

**Ramos JA, Zenser N, Leyser O, Callis J.** 2001. Rapid Degradation of Auxin/Indoleacetic

Acid Proteins Requires Conserved Amino Acids of Domain II and Is Proteasome Dependent. *Plant Cell* **13**, 2349–2360.

**Salehin M, Bagchi R, Estelle M.** 2015. SCFTIR1/AFB-Based Auxin Perception: Mechanism and Role in Plant Growth and Development. *The Plant Cell* **27**, 9–19.

**Szemenyei H, Hannon M, Long JA.** 2008. TOPLESS mediates auxin-dependent transcriptional repression during Arabidopsis embryogenesis. *Science* **319**, 1384–1386.

**Tirosh I, Weinberger A, Carmi M, Barkai N.** 2006. A genetic signature of interspecies variations in gene expression. *Nature Genetics* **38**, 830–834.

**Ulmasov T, Hagen G, Guilfoyle T.** 1999. Activation and repression of transcription by auxin-response factors. *Proceedings of the National Academy of Sciences USA* **96**, 5844–5849.

**Ulmasov T, Liu ZB, Hagen G, Guilfoyle TJ.** 1995. Composite structure of auxin response elements. *The Plant Cell* **7**, 1611–23.

**Vert G, Walcher CL, Chory J, Nemhauser JL.** 2008. Integration of auxin and brassinosteroid pathways by Auxin Response Factor 2. *Proceedings of the National Academy of Sciences USA* **105**, 9829–9834.

**Vinga S, Almeida J.** 2003. Alignment-free sequence comparison—a review. *Bioinformatics* **19**, 513–523.

**Walcher CL, Nemhauser JL.** 2012. Bipartite Promoter Element Required for Auxin Response. *Plant Physiology* **158**, 273–282.

**Warnes GR, Bolker B, Bonebakker L, et al.** 2014. *gplots: Various R programming tools for plotting data*. <http://CRAN.R-project.org/package=gplots>

**Weijers D, Benkova E, Jäger KE, Schlereth A, Hamann T, Kientz M, Wilmoth JC, Reed JW, Jürgens G.** 2005. Developmental specificity of auxin response by pairs of ARF and Aux/IAA transcriptional regulators. *The EMBO Journal* **24**, 1874–1885.

**Zemlyanskaya EV, Wiebe DS, Omelyanchuk NA, Levitsky VG, Mironova VV.** 2016. Meta-analysis of transcriptome data identified TGTCNN motif variants associated with the response to plant hormone auxin in *Arabidopsis thaliana* L. *Journal of Bioinformatics and Computational Biology* **14**, 1641009.

**Zenser N, Ellsmore A, Leasure C, Callis J.** 2001. Auxin modulates the degradation rate of Aux/IAA proteins. *Proceedings of the National Academy of Sciences USA* **98**, 11795–11800.

# Table 1: Conserved auxin up-regulated genes

Genes significantly up-regulated ( $\log_2$  fold change > 1) in *A. thaliana* and *A. lyrata* after 1 h (<sup>1</sup>) and/or 3 h (<sup>3</sup>) of auxin treatment in 7 days-old seedlings. Detailed information on *A. lyrata* locus identifiers, corresponding ATH1 array elements and expression levels are shown in Tab. S1.

## AUX/IAA

|           |                     |
|-----------|---------------------|
| AT1G04240 | IAA3 <sup>1</sup>   |
| AT1G15580 | IAA5 <sup>1</sup>   |
| AT2G33310 | IAA13 <sup>13</sup> |
| AT3G15540 | IAA19 <sup>13</sup> |
| AT3G23030 | IAA2 <sup>13</sup>  |
| AT3G62100 | IAA30 <sup>1</sup>  |
| AT4G14560 | IAA1 <sup>13</sup>  |
| AT4G28640 | IAA11 <sup>13</sup> |
| AT4G32280 | IAA29 <sup>13</sup> |
| AT5G43700 | IAA4 <sup>1</sup>   |

## auxin transport

|           |                    |
|-----------|--------------------|
| AT1G23080 | PIN7 <sup>1</sup>  |
| AT1G70940 | PIN3 <sup>13</sup> |
| AT1G73590 | PIN1 <sup>1</sup>  |
| AT2G17500 | PILS5 <sup>3</sup> |
| AT2G21050 | LAX2 <sup>1</sup>  |

## ASL/LBD

|           |                           |
|-----------|---------------------------|
| AT2G42430 | ASL18/LBD16 <sup>13</sup> |
| AT2G42440 | ASL15/LBD17 <sup>13</sup> |
| AT3G58190 | ASL16/LBD29 <sup>13</sup> |

## expansins

|           |                    |
|-----------|--------------------|
| AT3G45970 | EXLA1 <sup>1</sup> |
| AT4G17030 | EXLB1 <sup>3</sup> |
| AT4G38400 | EXLA2 <sup>1</sup> |

## GH3

|           |                     |
|-----------|---------------------|
| AT2G14960 | GH3.1 <sup>1</sup>  |
| AT2G23170 | GH3.3 <sup>13</sup> |
| AT4G27260 | GH3.5 <sup>13</sup> |
| AT5G54510 | GH3.6 <sup>13</sup> |

## SAUR

|           |                      |
|-----------|----------------------|
| AT2G18010 | SAUR10 <sup>1</sup>  |
| AT4G34760 | SAUR50 <sup>1</sup>  |
| AT4G34770 | SAUR1 <sup>1</sup>   |
| AT4G38850 | SAUR15 <sup>13</sup> |
| AT4G38860 | SAUR16 <sup>13</sup> |

## others

|                         |                         |
|-------------------------|-------------------------|
| AT1G02850 <sup>3</sup>  | AT3G28740 <sup>3</sup>  |
| AT1G05560 <sup>3</sup>  | AT3G30180 <sup>3</sup>  |
| AT1G05680 <sup>13</sup> | AT3G42800 <sup>1</sup>  |
| AT1G10380 <sup>3</sup>  | AT3G43270 <sup>3</sup>  |
| AT1G14280 <sup>1</sup>  | AT3G44540 <sup>3</sup>  |
| AT1G17170 <sup>3</sup>  | AT3G50340 <sup>13</sup> |
| AT1G17180 <sup>3</sup>  | AT3G51410 <sup>1</sup>  |
| AT1G21980 <sup>1</sup>  | AT3G54950 <sup>1</sup>  |
| AT1G23340 <sup>1</sup>  | AT4G15550 <sup>3</sup>  |
| AT1G23730 <sup>3</sup>  | AT4G16515 <sup>1</sup>  |
| AT1G29195 <sup>13</sup> | AT4G16515 <sup>3</sup>  |
| AT1G30100 <sup>1</sup>  | AT4G17350 <sup>13</sup> |
| AT1G30760 <sup>3</sup>  | AT4G21200 <sup>1</sup>  |
| AT1G32870 <sup>3</sup>  | AT4G30140 <sup>3</sup>  |
| AT1G57560 <sup>1</sup>  | AT4G37295 <sup>13</sup> |
| AT1G59740 <sup>1</sup>  | AT5G02760 <sup>13</sup> |
| AT1G64405 <sup>13</sup> | AT5G04190 <sup>1</sup>  |
| AT1G70270 <sup>13</sup> | AT5G06860 <sup>3</sup>  |
| AT2G03760 <sup>1</sup>  | AT5G12050 <sup>13</sup> |
| AT2G26710 <sup>1</sup>  | AT5G18560 <sup>1</sup>  |
| AT2G29490 <sup>1</sup>  | AT5G26930 <sup>1</sup>  |
| AT2G39370 <sup>13</sup> | AT5G47370 <sup>13</sup> |
| AT2G41820 <sup>1</sup>  | AT5G50130 <sup>1</sup>  |
| AT2G47550 <sup>3</sup>  | AT5G51440 <sup>3</sup>  |
| AT3G03660 <sup>1</sup>  | AT5G52900 <sup>13</sup> |
| AT3G09270 <sup>3</sup>  | AT5G53290 <sup>1</sup>  |
| AT3G13380 <sup>3</sup>  | AT5G57760 <sup>1</sup>  |
| AT3G22370 <sup>3</sup>  | AT5G61820 <sup>3</sup>  |
| AT3G26760 <sup>1</sup>  | AT5G62280 <sup>1</sup>  |
| AT3G26960 <sup>1</sup>  | AT5G65320 <sup>3</sup>  |
| AT3G28420 <sup>1</sup>  | AT5G66940 <sup>1</sup>  |

## Figure legends

### Fig. 1: Physiological auxin responses of *A. thaliana* and *A. lyrata*

Relative root length (treated vs. control) of seedlings grown on different concentrations of (A) IAA, (B) 2,4-D, or (C) NAA. Three (A) or five (B,C) days-old seedlings were transferred to hormone-containing medium and grown for additional five (A) or three (B,C) days. (D) Relative hypocotyl length (28 °C/20 °C) of eight days-old seedlings. Box plots show medians (horizontal bar), interquartile ranges (IQR, boxes), and data ranges (whiskers) excluding outliers (defined as  $> 1.5 \times \text{IQR}$ ). Individual data points are superimposed as beeswarm plots. Asterisks denote significant differences between treatment responses of *A. thaliana* and *A. lyrata* as assessed by two-way ANOVA (i.e. genotype  $\times$  treatment effect,  $P < 0.05$ ) of the absolute data presented in Fig. S1.

### Fig. 2: Quantification of [<sup>3</sup>H]-IAA uptake and ATH1-based assessment of auxin-induced transcriptome changes

(A) Seven days-old seedlings were treated with 2 ng [<sup>3</sup>H]-IAA per mg seedling fresh weight for 1 h in liquid ATS medium. Scintillation counts were recorded after removal of radiolabeled IAA and ten subsequent wash steps with liquid ATS. Bar plots show mean [<sup>3</sup>H]-IAA levels of three biological replicates and error bars denote SEM. No significant differences were detected by a two-sided t-test ( $P < 0.05$ ). Results of a second independent experiment are shown in Supplemental Fig. S1G. (B) Stacked bars show the number of up- and down-regulated genes with an auxin-induced significant ( $\text{fdr} \leq 0.05$ ) change in expression level in black and white, respectively. (C) Venn diagrams illustrate the number of genes commonly or specifically up-regulated in *A. thaliana* (gray) and *A. lyrata* (green) after 1 h and 3 h of auxin treatment ( $\text{lfc} = \log_2$  fold change,  $\text{fdr} =$  false discovery rate). The complete list of genes is presented as Supplemental Data File 1.

### Fig. 3: Cluster analysis of auxin-regulated genes and allocation of known *cis*-regulatory elements

Hierarchical clustering of genes that showed an auxin-induced expression response (coefficient of variation ( $\text{cv}$ )  $> 0.05$ ) in at least one species at one time point of auxin treatment using a modified Pearson correlation ( $1 - \text{mod.r}$ ) among

expression profiles as distance measure. A threshold of  $1-mod.r = 0.3$  provided 14 clusters. Expression profiles show mean (solid lines) and median (dotted lines) expression levels of genes in one cluster. Areas shaded in gray and green denote interquartile ranges for *A. thaliana* and *A. lyrata*, respectively. Bar plots illustrate the presence of known *cis*-element sequences with functional relevance in auxin biology. “4”: AATAAG, “11”: TGTCTC, “13”: CACATG, “14”: CGTG[TC]G, “16”: CACCAT, “18”: TGTCTG, “20”: TGT[CG]T[CG][CGT]C, “29”: TGTATATAT, and “35”: ATACGTGT. A full description of *cis*-elements is shown in Tab. S2 and S3. A comprehensive analysis of the presence of known regulatory sequences is depicted in Fig. S3.

#### **Fig. 4: De novo identification of promoter elements**

(A) Analysis of promoter and expression diversity in genes that are significantly up-regulated in both species, up-regulated in either *A. thaliana* or *A. lyrata* or non-responsive (neutral) to 1 hour of auxin treatment. Divergence among expression profiles and promoter sequences was assessed by *mod.r* correlation of expression profiles and 8-mer sliding window correlation (*kmer.r*) results of promoter sequences, respectively. (B) *De novo* identification of putative *cis*-regulatory elements that are significantly overrepresented in auxin-induced genes using Dimont . Motifs shown were significantly enriched in genes up-regulated in both species (data set 1) or in at least one species (data set 2). Motifs were additionally tested for enrichment in an independent auxin-induced expression data set of *A. thaliana* (see *p'* values in Fig. S4). Frequency of occurrence [%] in the positive and control data sets are denoted by  $\%_{positive}$  and  $\%_{control}$ , respectively.

#### **Fig. 5: AUX/IAA expression divergence correlates with downstream expression profiles**

(A) Promoter divergence for core auxin signaling genes was determined as described in Fig. 4A. (B) Hierarchical clustering of PIF-normalized (mean-centered) AUX/IAA expression profiles using  $1-mod.r$  as distance measure. (C) Selected genes with expression profiles that are positively (+) or negatively (-) correlated to the mean expression profiles (solid black lines) of AUX/IAA clusters shown in B as determined by the profile interaction finder (PIF) algorithm. A complete list of identified genes is presented as Data File S2.

# **Fig. 6: Inter- and intra-species expression divergence of *AUX/IAA* genes**

(A) Comparison of mean *AUX/IAA* expression divergence detected in the inter-species comparison of *A. thaliana* vs. *A. lyrata* and an intra-species comparison among seven *A. thaliana* accessions. *AUX/IAAs* are color-coded according to their cluster number in Figure 5B. (B) Independent hierarchical clustering of PIF-normalized (mean-centered) intra-species *AUX/IAA* expression profiles using 1-*mod.r* as distance measure. Asterisks mark cluster numbers of the intra-species data set to allow differentiation from clusters in Figure 5B. (C) Venn diagrams illustrate the overlap of genes with expression profiles that are positively (+) or negatively (-) correlated to the mean expression profiles of *AUX/IAA* clusters 4 (Figure 5B) and cluster 5\*. (D) List of gene identities with overlapping correlations. A complete list of specific and overlapping genes is shown in Supplemental Data File 2.

## Figures

**Fig. 1**

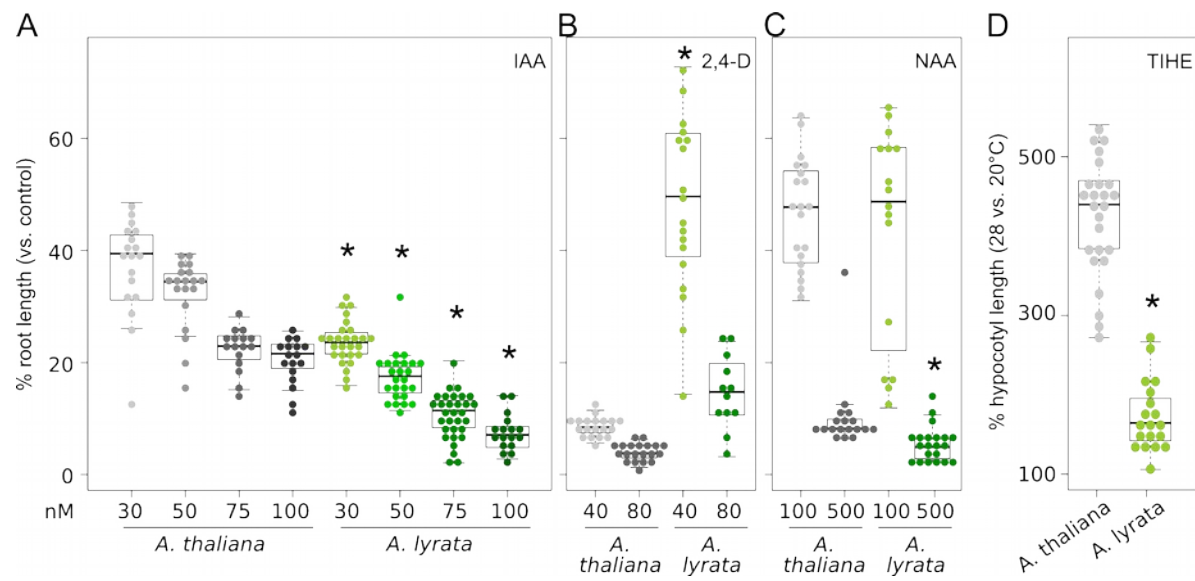



**Fig. 2**

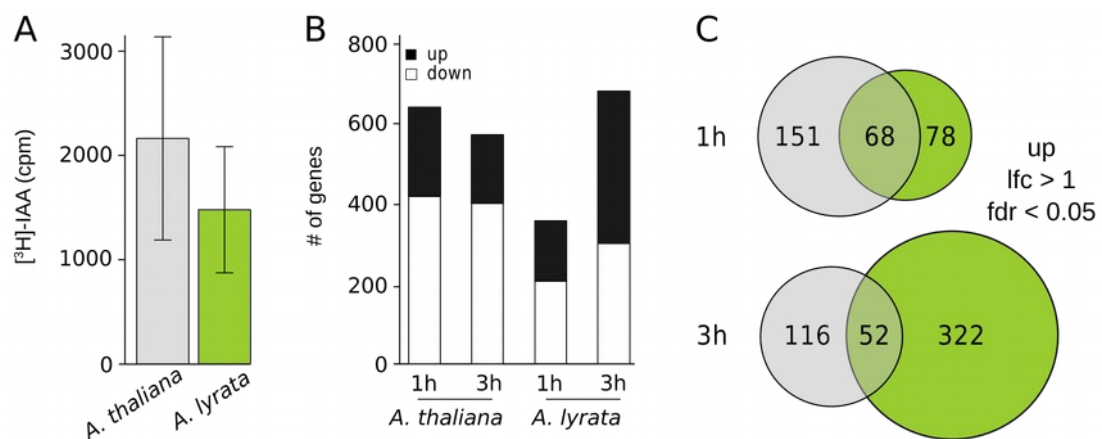

**Fig. 3**

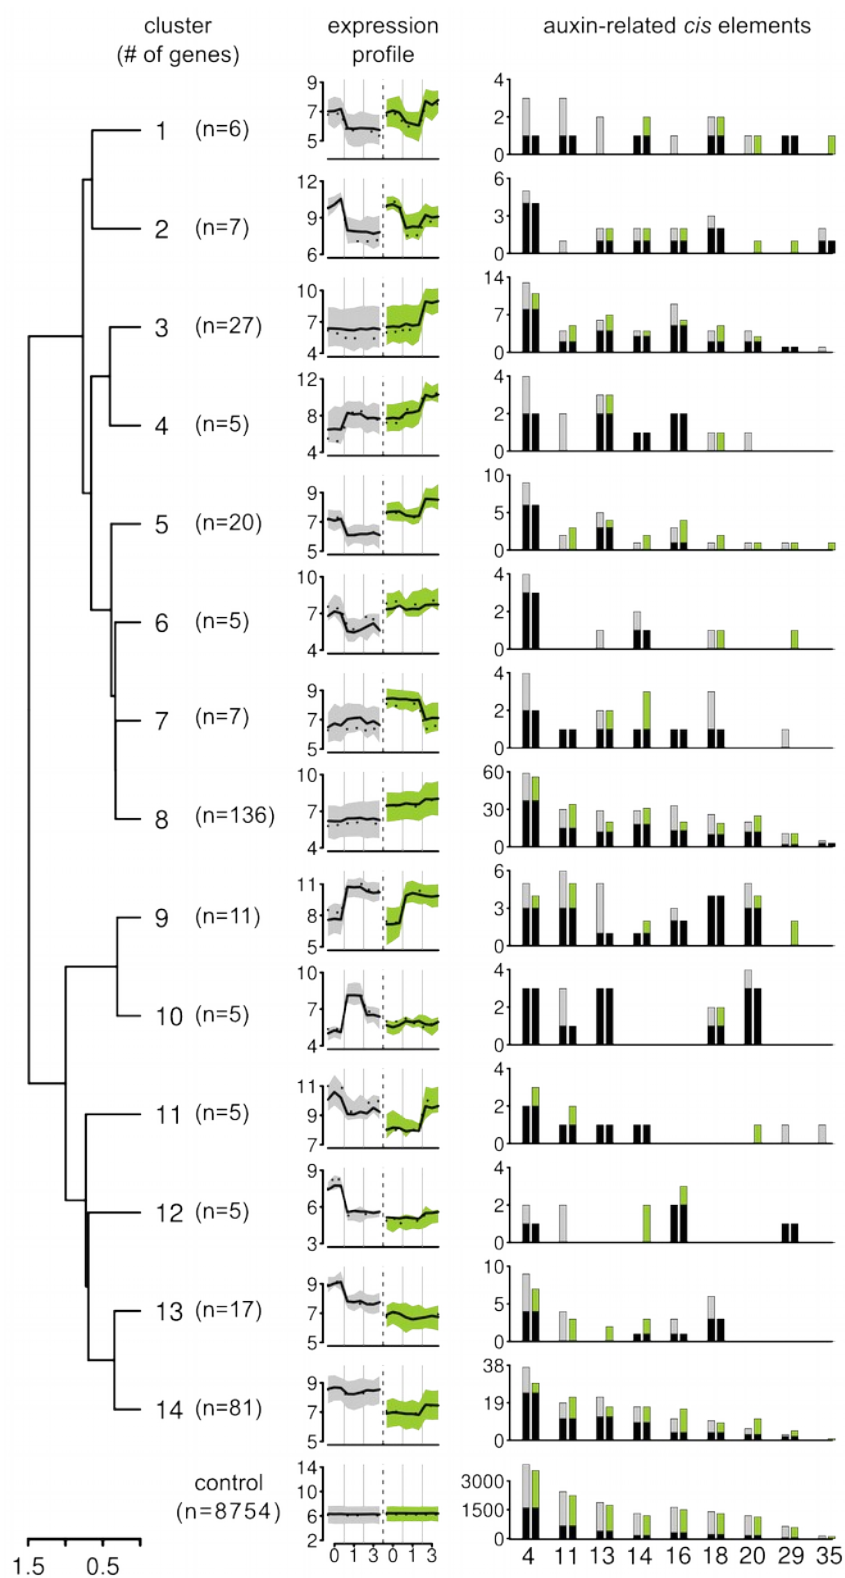

**Fig. 4**

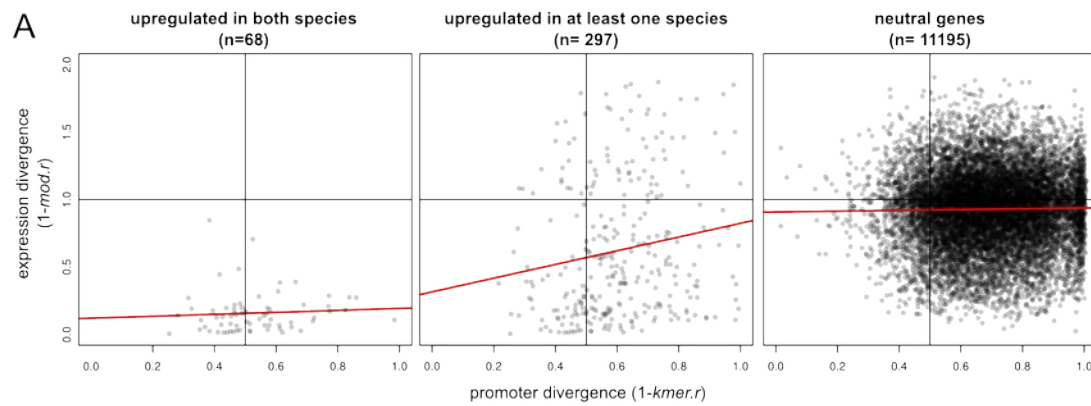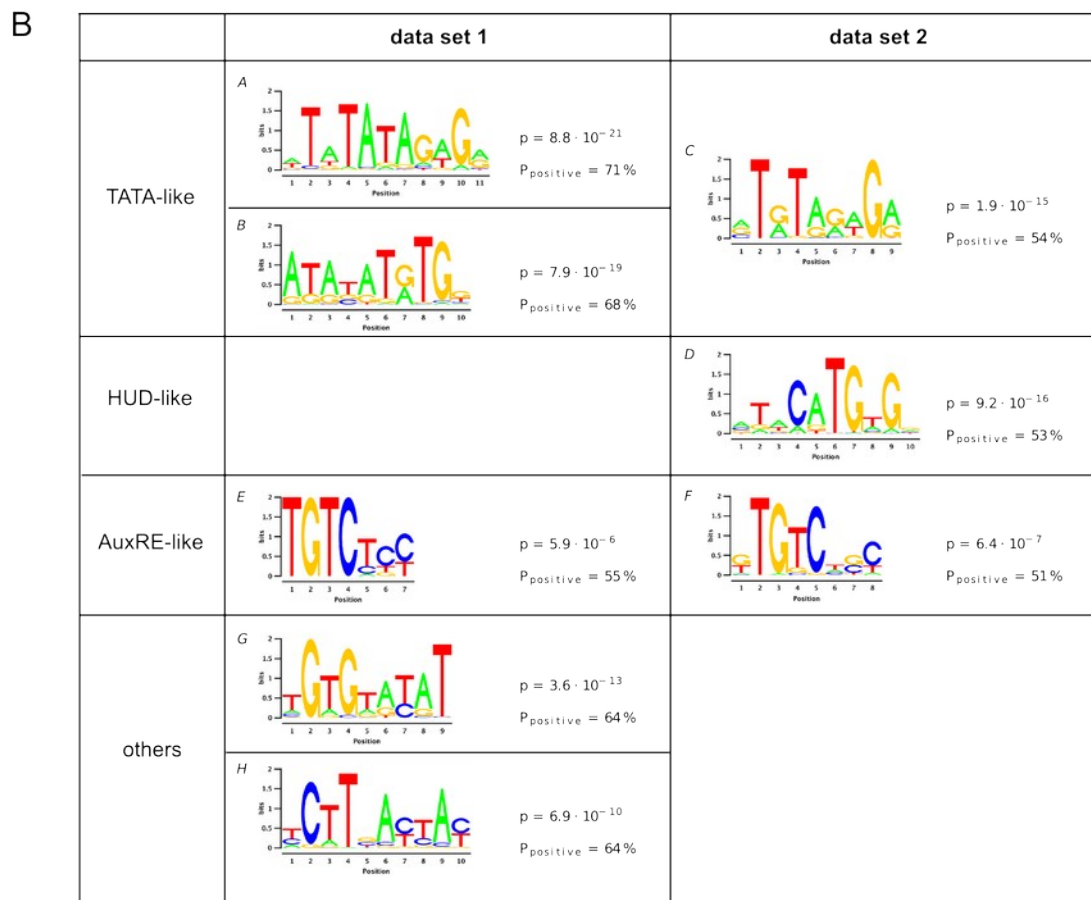

**Fig. 5**

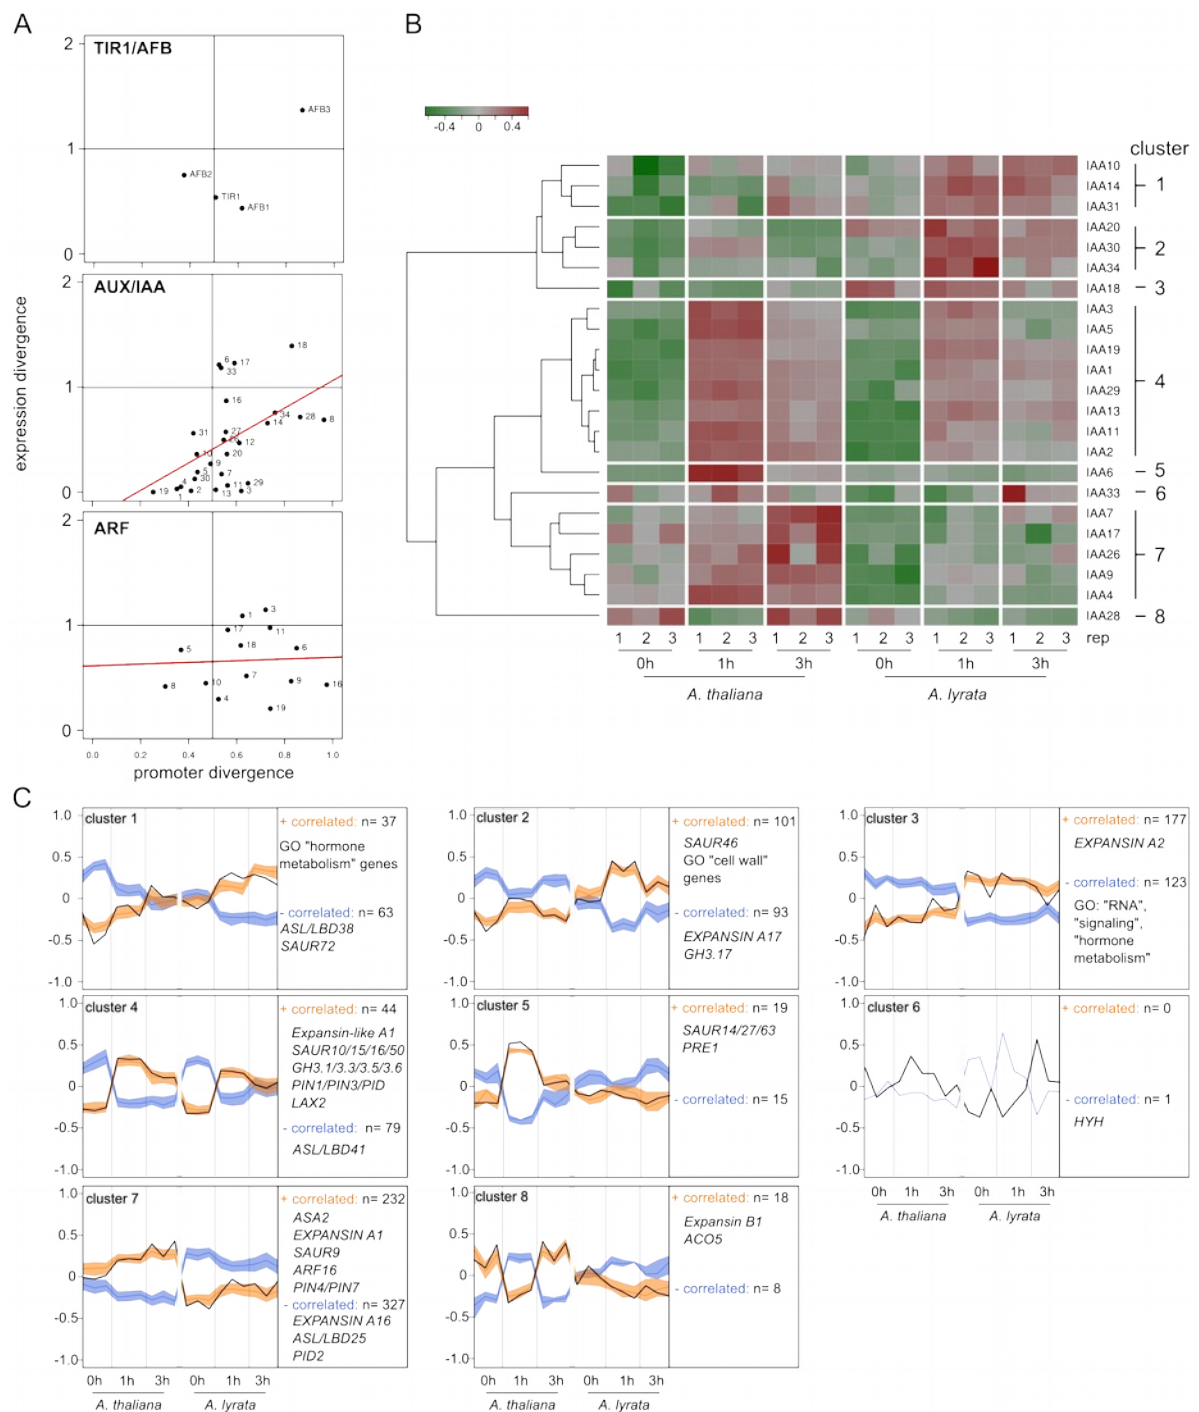

**Fig. 6:**

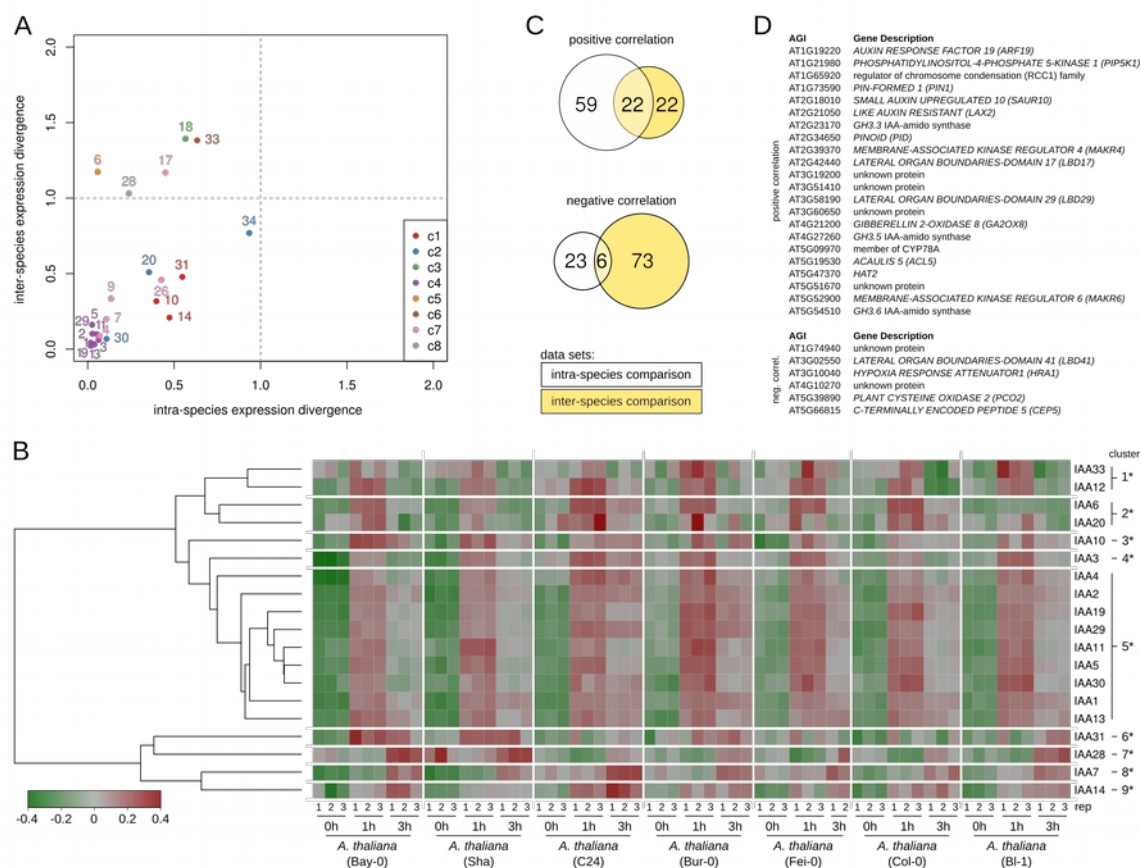

Source: http://biorxiv.org/content/10.1101/038422v2.full.pdf
